# Supplementary material for: Synthesis of narrow-band red-emitting K2SiF6:Mn4+ phosphors for a deep red monochromatic LED and ultrahigh color quality warm-white LEDs
Source: Royal Society of Chemistry journal article supplement (doi:10.1039/c4tc02042a), 2014-11-19
Supplement: c4tc02042a1.pdf [file c4tc02042a1.pdf]

## Electronic Supplementary Information

# **Synthesis of narrow-band red-emitting $\text{K}_2\text{SiF}_6:\text{Mn}^{4+}$ phosphors for a deep red monochromatic LED and ultrahigh color quality warm-white LEDs**

Ji Hye Oh, Heejoon Kang, Yun Jae Eo, Hoo Keun Park, and Young Rag Do\*

Department of Chemistry, Kookmin University, Seoul, 136-702, Republic of Korea

yrdo@kookmin.ac.kr

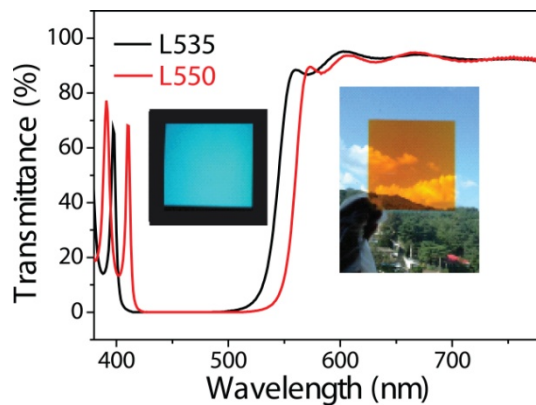

**Fig. S1.** The transmittance spectra of long-wavelength pass dichroic filters (LPDFs: L535 and L550, number denotes the cut-off wavelength of LPDFs), and photographs of the transmission and reflection of L535.

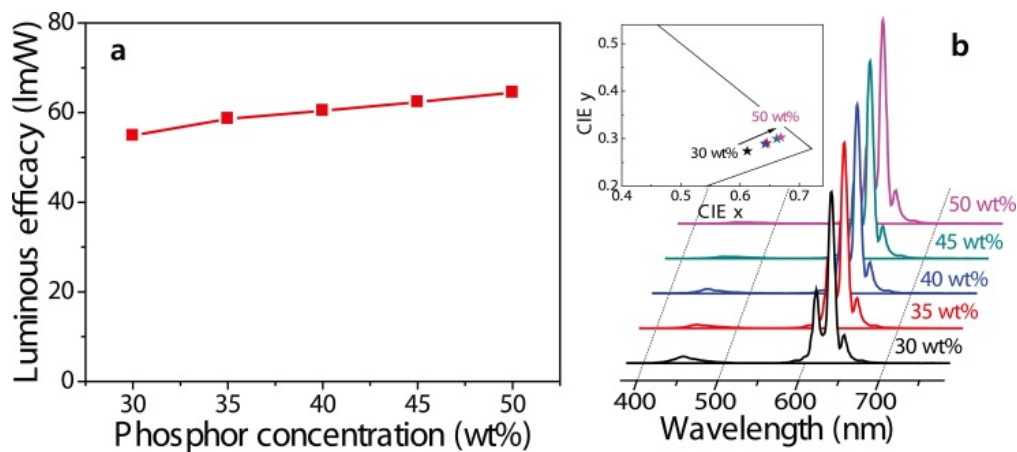

**Fig. S2.** (a) LEs and (b) EL spectra and 1931 CIE color coordinates of the  $R_{N,B,M}$  pc-LED as a function of the  $K_2SiF_6:Mn^{4+}$  phosphor concentrations.

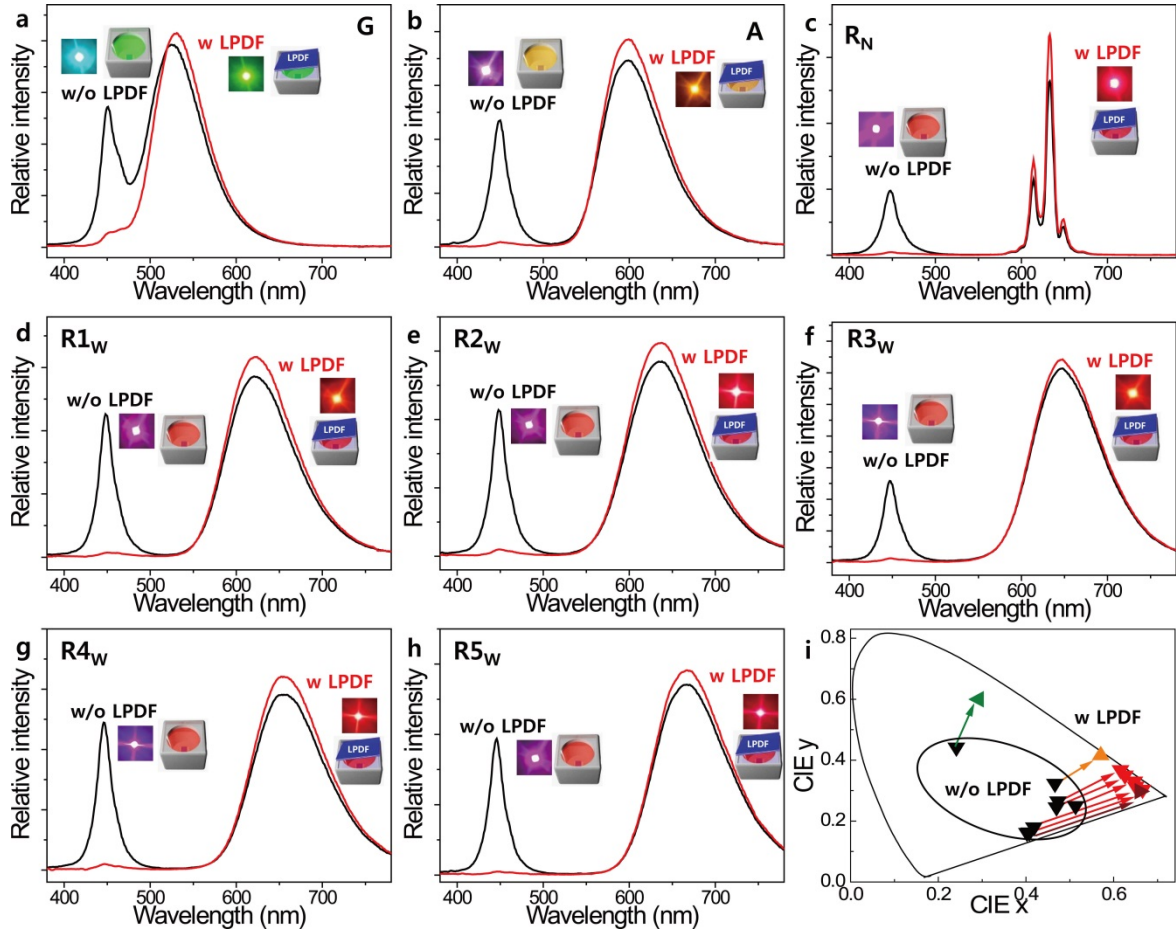

**Fig. S3.** Electroluminescent spectra of pc-LEDs with and without LPDF (inset: photographs of emission and schematic diagram) (a) green, (b) amber, (c)  $R_N$ , (d)  $R1_w$ , (e)  $R2_w$ , (f)  $R3_w$ , (g)  $R4_w$  and (g)  $R5_w$ .

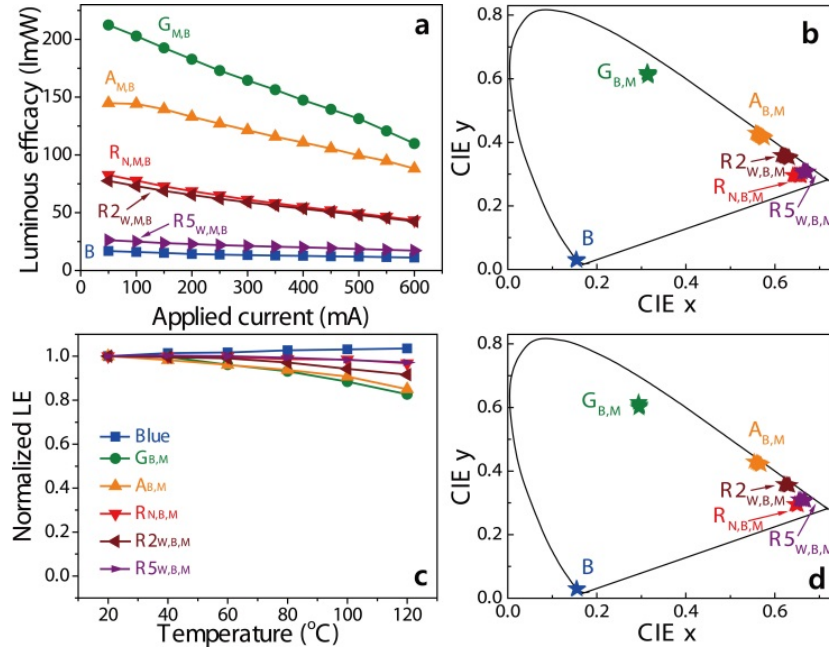

**Fig. S4.** The current dependence of the blue LED and  $G_{B,M}$ ,  $A_{B,M}$ ,  $R_{N,B,M}$ ,  $R2_{W,B,M}$ , and  $R5_{W,B,M}$  pc-LEDs: (a) relative LE and (b) 1931 CIE color coordinates. The temperature dependence of the blue LED and  $G_{B,M}$ ,  $A_{B,M}$ ,  $R_{N,B,M}$ ,  $R2_{W,B,M}$ , and  $R5_{W,B,M}$  pc-LEDs: (c) normalized LE and (d) 1931 CIE color coordinates.

Table S1. The optical properties of six combinations of multi-package white LEDs.

| $R_{B,M}A_{B,M}G_{B,M}B$ | CCT (K) | Color coordinates |       | LE (lm/W) | LER (lm/W) | CRI ( $R_a$ ) | $R_9$ | CQS ( $Q_a$ ) |
|--------------------------|---------|-------------------|-------|-----------|------------|---------------|-------|---------------|
|                          |         | CIE x             | CIE y |           |            |               |       |               |
| $R_{N,B,M}$              | 6584    | 0.312             | 0.323 | 95        | 299        | 87            | 96    | 88            |
|                          | 5000    | 0.345             | 0.351 | 101       | 312        | 89            | 90    | 91            |
|                          | 3448    | 0.408             | 0.391 | 109       | 328        | 92            | 95    | 93            |
|                          | 3012    | 0.434             | 0.400 | 107       | 328        | 92            | 94    | 93            |
|                          | 2756    | 0.456             | 0.410 | 107       | 331        | 94            | 93    | 93            |
|                          | 2092    | 0.512             | 0.408 | 95        | 318        | 94            | 71    | 90            |
| $R1_{W,B,M}$             | 6500    | 0.314             | 0.321 | 85        | 289        | 83            | 35    | 81            |
|                          | 4905    | 0.348             | 0.354 | 93        | 312        | 83            | 30    | 83            |
|                          | 3473    | 0.412             | 0.404 | 105       | 333        | 82            | 11    | 83            |
|                          | 3021    | 0.438             | 0.409 | 105       | 329        | 82            | 8     | 82            |
|                          | 2786    | 0.459             | 0.420 | 104       | 330        | 80            | 1     | 82            |
|                          | 2066    | 0.526             | 0.423 | 86        | 316        | 68            | -32   | 75            |
| $R2_{W,B,M}$             | 6500    | 0.314             | 0.321 | 87        | 291        | 84            | 49    | 82            |
|                          | 4976    | 0.346             | 0.353 | 93        | 305        | 84            | 40    | 84            |
|                          | 3510    | 0.408             | 0.397 | 100       | 316        | 85            | 32    | 85            |
|                          | 3087    | 0.432             | 0.404 | 101       | 312        | 85            | 27    | 84            |
|                          | 2794    | 0.454             | 0.412 | 98        | 309        | 84            | 23    | 84            |
|                          | 2058    | 0.522             | 0.417 | 82        | 293        | 74            | -10   | 79            |
| $R3_{W,B,M}$             | 6500    | 0.313             | 0.332 | 90        | 287        | 84            | 58    | 85            |
|                          | 4952    | 0.347             | 0.355 | 94        | 289        | 87            | 67    | 87            |
|                          | 3437    | 0.407             | 0.388 | 93        | 292        | 89            | 57    | 88            |
|                          | 2941    | 0.439             | 0.401 | 89        | 288        | 89            | 49    | 87            |
|                          | 2653    | 0.463             | 0.411 | 87        | 287        | 88            | 40    | 87            |
|                          | 2000    | 0.524             | 0.410 | 73        | 264        | 79            | 14    | 80            |
| $R4_{W,B,M}$             | 6542    | 0.312             | 0.328 | 91        | 273        | 84            | 67    | 85            |
|                          | 4952    | 0.347             | 0.355 | 92        | 278        | 87            | 71    | 88            |
|                          | 3437    | 0.410             | 0.394 | 91        | 275        | 89            | 61    | 88            |
|                          | 3021    | 0.434             | 0.400 | 87        | 265        | 89            | 56    | 88            |
|                          | 2660    | 0.461             | 0.407 | 83        | 254        | 88            | 48    | 87            |
|                          | 2029    | 0.521             | 0.411 | 69        | 217        | 81            | 24    | 82            |
| $R5_{W,B,M}$             | 6584    | 0.312             | 0.330 | 90        | 273        | 83            | 59    | 84            |
|                          | 5053    | 0.344             | 0.357 | 90        | 275        | 85            | 64    | 87            |
|                          | 3497    | 0.406             | 0.393 | 86        | 275        | 88            | 55    | 87            |
|                          | 3040    | 0.433             | 0.400 | 82        | 268        | 88            | 52    | 86            |
|                          | 2653    | 0.462             | 0.408 | 77        | 261        | 86            | 42    | 85            |
|                          | 2025    | 0.525             | 0.415 | 64        | 240        | 78            | 19    | 81            |
